# Supplementary material for: Detection of Prion Protein in Urine-Derived Injectable Fertility Products by a Targeted Proteomic Approach
Source: PubMed Central journal article supplement (PMC3063168; doi:10.1371/journal.pone.0017815), 2011-03-23
Supplement: pone.0017815.s001.pdf [file pone.0017815.s001.pdf]

# Figure S1

MS/MS spectra of peptides identified in the 2-D gel electrophoresis spots as PrP tryptic peptides

Sequences identified using the Mascot search engine:

**209-220: VVEQMCITQYER**

**209-220: VVEQMoxCITQYER**

**137-148: PIIHFGSDYEDR**

**157-164: YPNQVYYR**

**221-228: ESQAYYQR**

**121-136: VVGGLGGYMLGSAMoxSR**

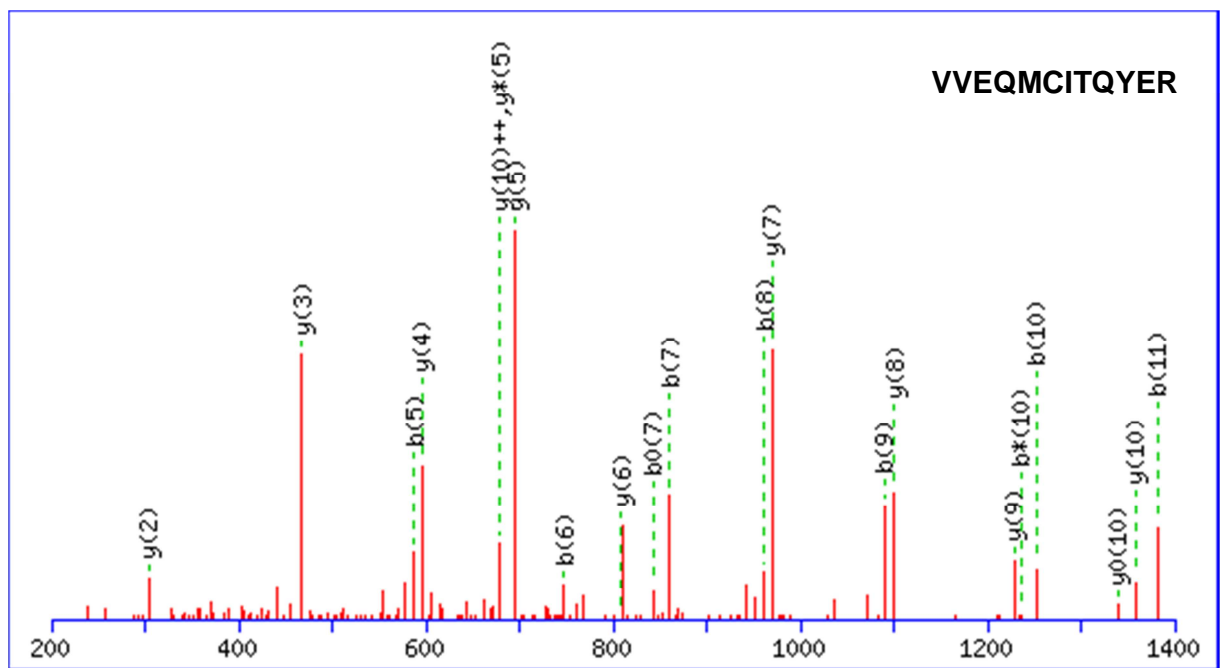

M=1554.8 Da. MS/MS from 778.4 (2+)

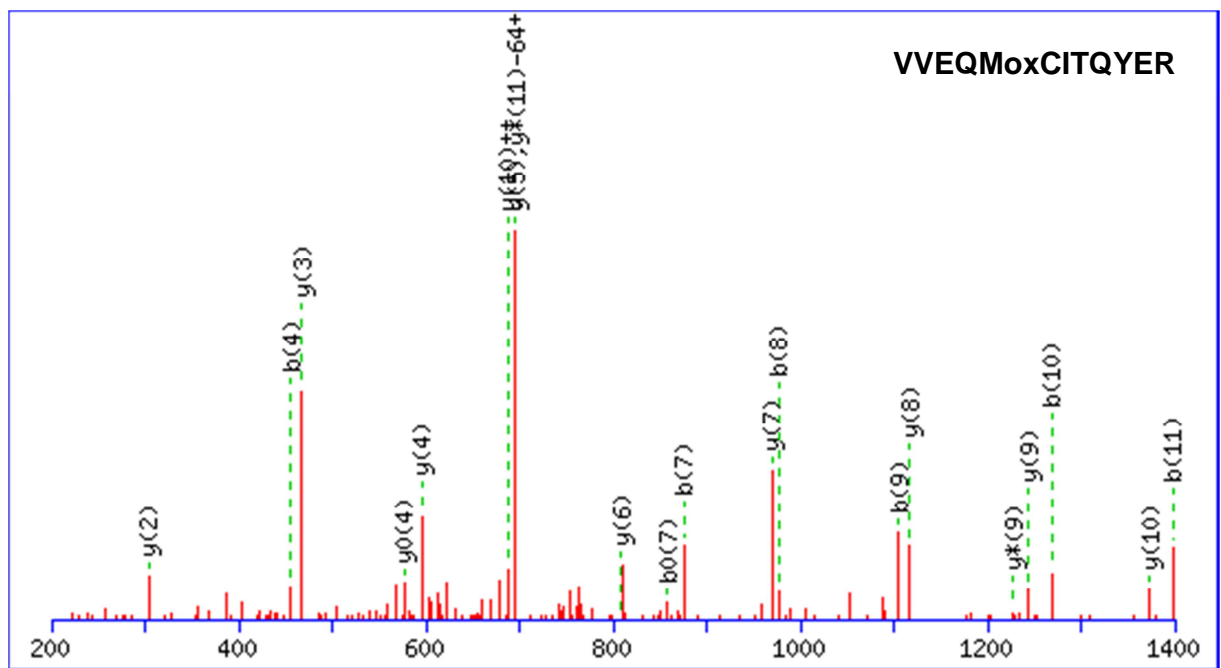

M=1570.7 Da. MS/MS from 786.4 (2+)

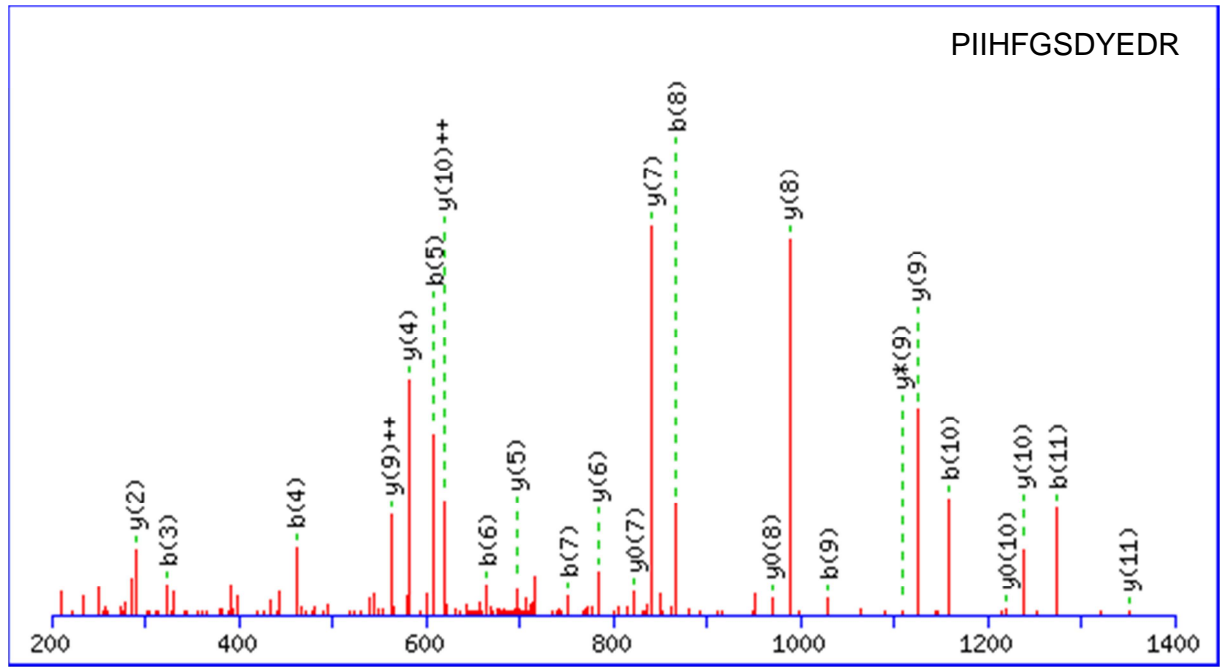

M=1447.7 Da. MS/MS from 724.8 (2+)

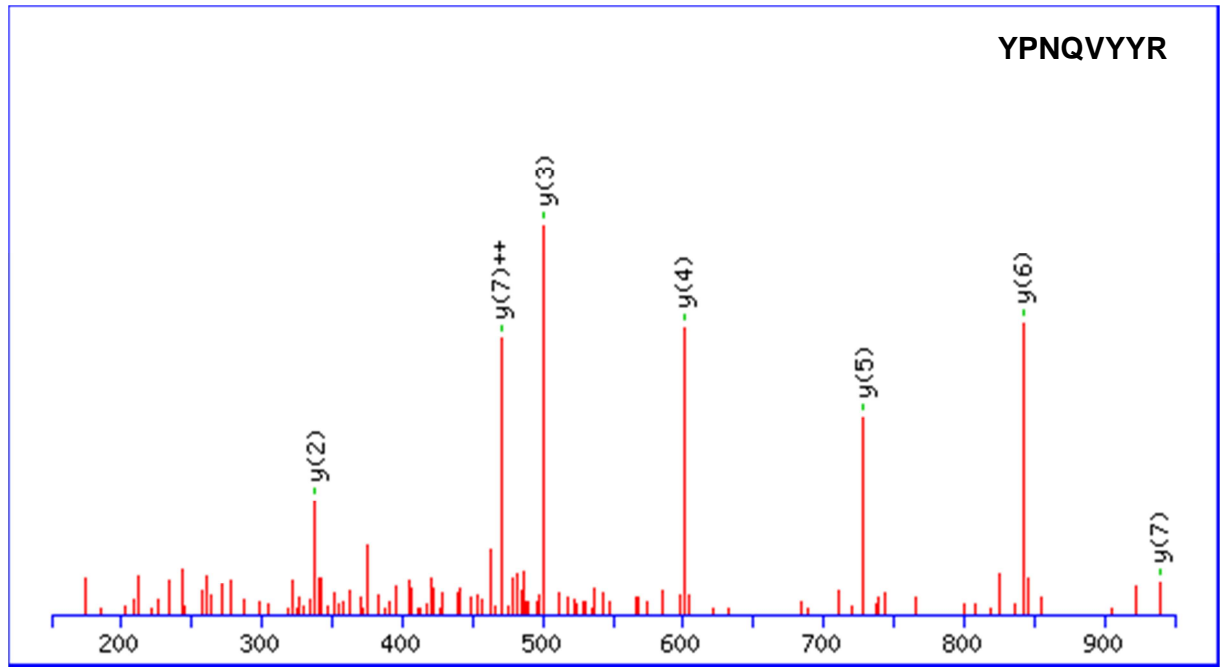

M=1101.5 Da. MS/MS from 551.8 (2+)

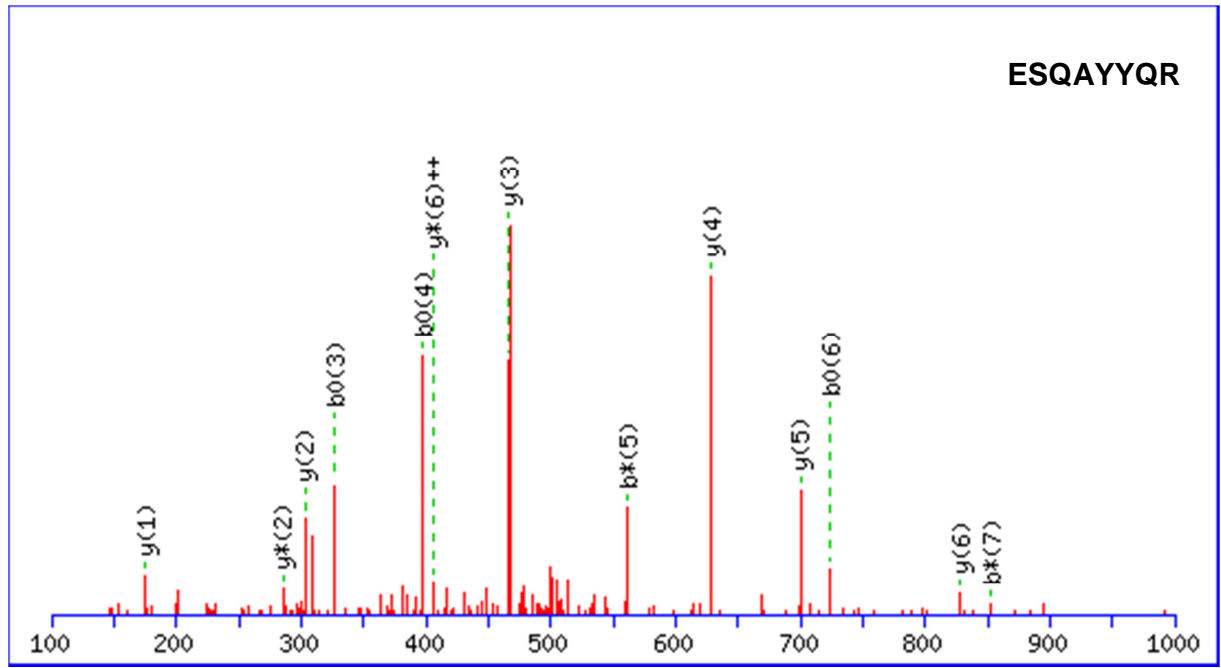

M=1043.5 Da. MS/MS from 522.7 (2+)

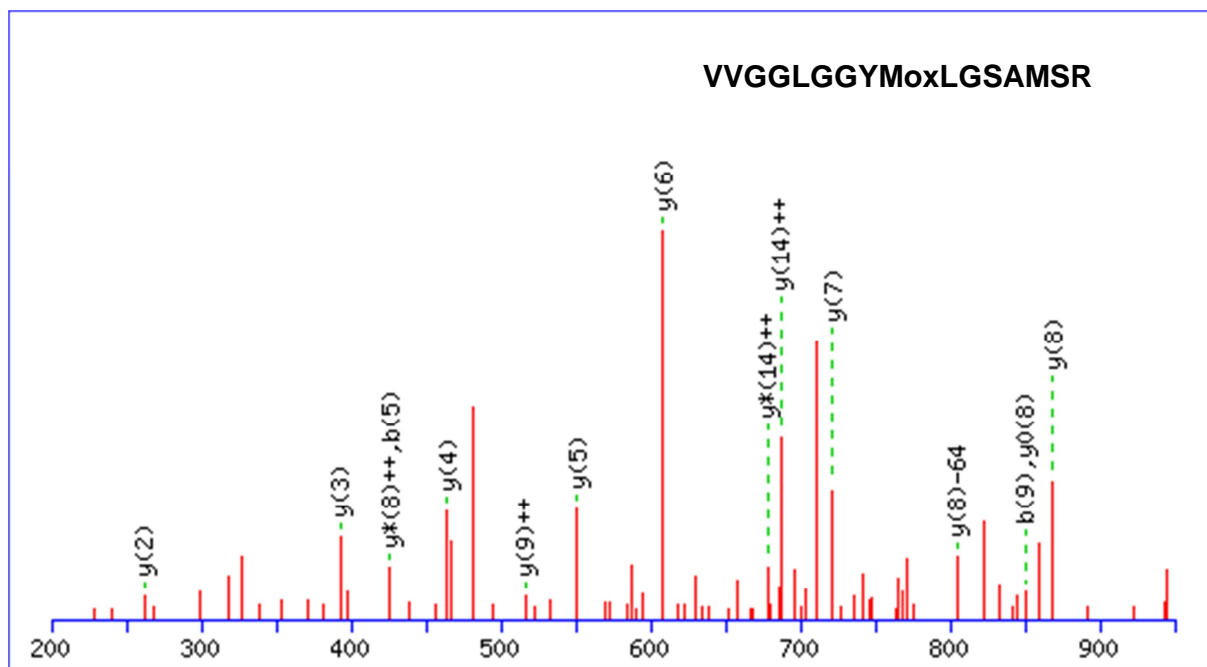

M=1569.7 Da. MS/MS from 785.8 (2+)
